# Supplementary material for: Hypoactive Visual Cortex, Prefrontal Cortex and Insula during Self-Face Recognition in Adults with First-Episode Major Depressive Disorder
Source: MDPI journal article supplement (doi:10.3390/biomedicines11082200), 2023-08-04
Supplement: s1 [file s1]

Supplementary Materials

# Hypoactive Visual Cortex, Prefrontal Cortex and Insula during Self-Face Recognition in Adults with First-Episode Major Depressive Disorder

**Table S1.** Medication information of adult patients with FEMDD.

| Medication information                    | Number of cases | Duration of medication (days) |
|-------------------------------------------|-----------------|-------------------------------|
| Not taking any medication                 | 44              | 0                             |
| Taking venlafaxine alone                  | 3               | 14,14,7                       |
| Taking venlafaxine/ mirtazapine/ oxazepam | 2               | 9,10                          |
| Taking venlafaxine/ mirtazapine           | 2               | 4,14                          |
| Taking venlafaxine/ oxazepam              | 1               | 14                            |
| Taking venlafaxine/ oxazepam/ zolpidem    | 1               | 7                             |
| Taking escitalopram alone                 | 4               | 13,8,7,3                      |
| Taking escitalopram/ trazodone            | 1               | 11                            |
| Taking escitalopram/ oxazepam             | 1               | 14                            |

**Notes:** 9 patients were taking venlafaxine 75-150mg/day and 6 patients were taking escitalopram 5-10mg/day. Among them, 8 patients received a combination of oxazepam 7.5-15mg/day or zolpidem tartrate 5-10mg/day or trazodone 25-50mg/day or mirtazapine 7.5-15mg/day and had been instructed to discontinue the medication 24 hours before the scan. Abbreviations: FEMDD, first-episode major depressive disorder.

The images of faces used in the present study (Figure1).

Thirty-six photos of facial expressions were selected from the Chinese facial affective picture system, among which included 12 male photos with neutral facial expressions (A1-A12), 12 female photos with neutral facial expressions (C1-C12), and 12 photos of other strangers' disgust face (D1-D12), one photo of each participant's self-neutral face (picture S) and one black background picture (BCP) (picture B).

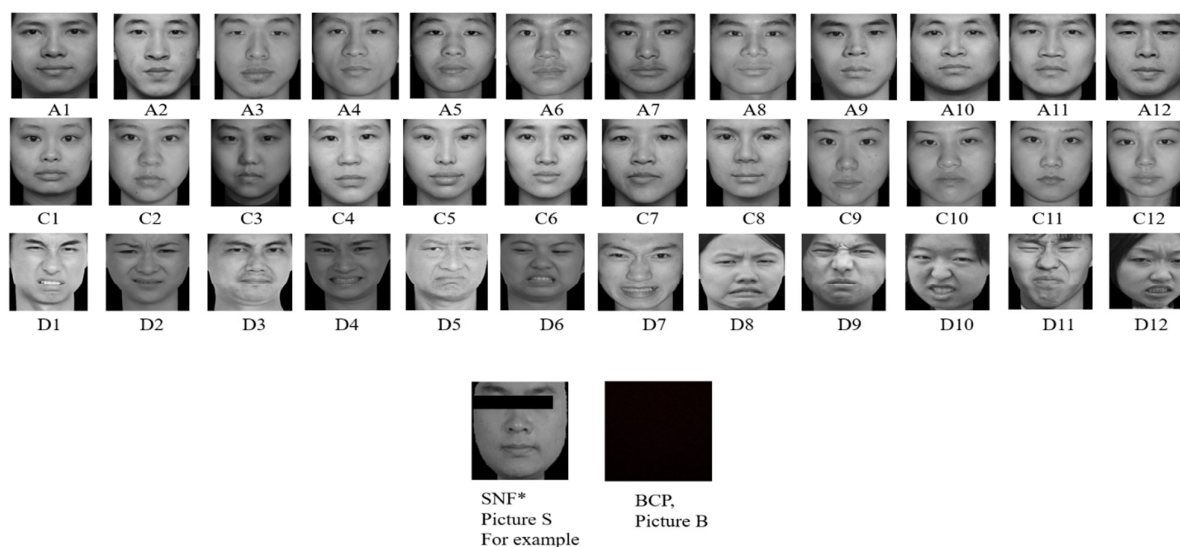

**Figure S1.** The images of faces. \* To protect the subjects' privacy, the eyes of the self-face were covered in this example. Abbreviations: A, others neutral face-male; C, others neutral face-female; D, others disgust face, sex random.

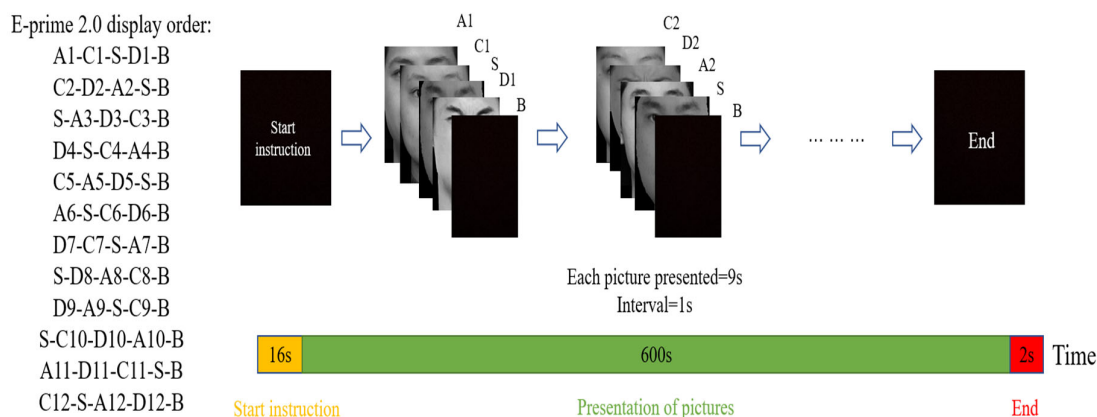

**Figure S2.** Stimulus design: Sequence of presentation during the task of self-face recognition via e-prime 2.0. Abbreviations: A, others neutral face-male; C, others neutral face-female; D, others disgust face, sex random.

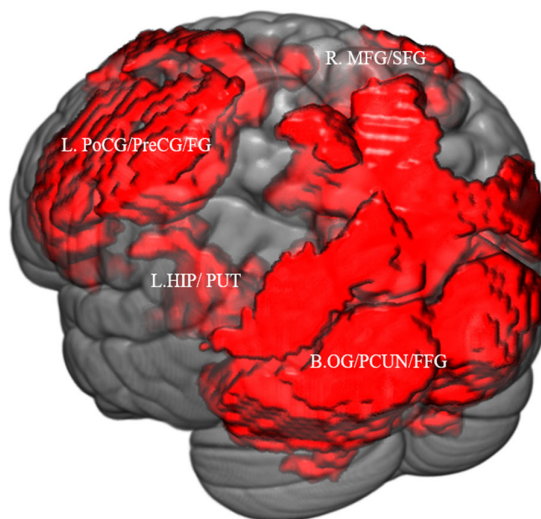

**Figure S3.** Results of two-way ANCOVA in the main effect of three conditions: (GRF correction: Voxel  $p < 0.001$ , Cluster  $p < 0.05$ , two tailed); condition 1: SNF vs BCP; condition 2: SNF vs ONF; condition 3: SNF vs ODF; Abbreviations: SNF, self-neutral face; ONF, others neutral face; ODF, others disgust face; R, right; L, left; PoCG, postcentral gyrus; PreCG, precentral gyrus; FG, prefrontal gyrus; MFG, middle prefrontal gyrus; SFG, superior prefrontal gyrus; HIP, hippocampus; PUT, putamen; OG, occipital gyrus; PCUN, precuneus; FFG, fusiform gyrus.

**Table S2.** Group difference of mean activation values between FEMDD and HC.

| Brain areas                        | Values of the activation signal in FEMDD (Mean ± SD) | Values of the activation signal in HC (Mean ± SD) | <i>t</i> values | <i>p</i> values | Contrast       |
|------------------------------------|------------------------------------------------------|---------------------------------------------------|-----------------|-----------------|----------------|
| Significant interaction Effect     |                                                      |                                                   |                 |                 |                |
| Left FFG/IOG and Left CAL/ MOG/IOG |                                                      |                                                   |                 |                 |                |
| Condition 1: SNF vs BCP            | 1.63±1.52                                            | 2.77±1.31                                         | -3.73           | 0.00*           | FEMDD<HC       |
| Condition 2: SNF vs ONF            | 0.07±0.41                                            | 0.24±0.30                                         | -2.18           | 0.03*           | FEMDD<HC       |
| Condition 3: SNF vs ODF            | -0.04±0.39                                           | 0.02±0.40                                         | -0.71           | 0.48            | No significant |
| Simple effect of T test:           |                                                      |                                                   |                 |                 |                |
| Bilateral OG/FFG                   | 1.57±1.47                                            | 2.56±1.16                                         | -3.41           | 0.00*           | FEMDD<HC       |
| (Condition1: SNF vs BCP)           |                                                      |                                                   |                 |                 |                |
| Right IFG/INS                      | -0.07±0.21                                           | 0.08± 0.15                                        | -3.67           | 0.00*           | FEMDD<HC       |
| (Condition2: SNF vs ONF)           |                                                      |                                                   |                 |                 |                |

**Note:** \*:  $p < 0.05$ ; Abbreviations: SNF, self-neutral face; ONF, others neutral face; ODF, others disgust face; BCP, black control picture; FEMDD, first-episode major depressive disorder; HC, healthy control; FFG, fusiform gyrus; IOG, inferior occipital gyrus; CAL, calcarine; MOG, middle occipital gyrus; IOG, inferior occipital gyrus; IFG, inferior prefrontal gyrus; INS, insula.

**Table S3.** Pearson correlation between abnormal brain activation and SDS respectively in FEMDD and HC ( $p < 0.05$ , two-tailed).

| Brain areas                              | Values of the activation signal in FEMDD (Mean ± SD) | FEMDD-SDS             | Values of the activation signal in HC (Mean ± SD) | HC-SDS               |
|------------------------------------------|------------------------------------------------------|-----------------------|---------------------------------------------------|----------------------|
| Bilateral occipital gyrus/fusiform gyrus | 1.57±1.47                                            | $r = 0.19, p = 0.14$  | 2.56±1.16                                         | $r = 0.04, p = 0.83$ |
| Condition1: SNF vs BCP                   |                                                      |                       |                                                   |                      |
| Right inferior frontal gyrus/Insula      | -0.07±0.21                                           | $r = -0.10, p = 0.43$ | 0.08±0.15                                         | $r = 0.06, p = 0.74$ |
| Condition2: SNF vs ONF                   |                                                      |                       |                                                   |                      |

Abbreviations: SNF, self-neutral face; ONF, others neutral face; ODF, others disgust face; FEMDD, first-episode major depressive disorder; HC, healthy control; SDS, self-disgust scale.

**Table S4.** Pearson correlation between abnormal brain activation and HAMD respectively in FEMDD and HC ( $p < 0.05$ , two-tailed).

| Brain areas                              | Values of the activation signal in FEMDD (Mean ± SD) | FEMDD-HAMD           | Values of the activation signal in HC (Mean ± SD) | HC- HAMD              |
|------------------------------------------|------------------------------------------------------|----------------------|---------------------------------------------------|-----------------------|
| Bilateral occipital gyrus/fusiform gyrus | 1.57±1.47                                            | $r = 0.05, p = 0.72$ | 2.56±1.16                                         | $r = 0.01, p = 0.97$  |
| Condition1: SNF vs BCP                   |                                                      |                      |                                                   |                       |
| Right inferior frontal gyrus/Insula      | -0.07±0.21                                           | $r = 0.05, p = 0.72$ | 0.08±0.15                                         | $r = -0.05, p = 0.77$ |
| Condition2: SNF vs ONF                   |                                                      |                      |                                                   |                       |

Abbreviations: SNF, self-neutral face; ONF, others neutral face; ODF, others disgust face; FEMDD, first-episode major depressive disorder; HC, healthy control; HAMD, Hamilton depression rating scale.

**Table S5.** Two-way ANCOVA analyze with two groups (FEMDD vs HC) by four conditions (ONF vs BCP, SNF vs BCP, SNF vs ONF and SNF vs ODF) with correction level of Gaussian Random Field (voxel  $p < 0.001$ , cluster  $p < 0.05$ , two-tailed, clusters size  $\geq 15$ ).

|                                                   | Brain areas                                                        | Voxels | Peak MNI coordinates<br>(x, y, z) | F/t value |
|---------------------------------------------------|--------------------------------------------------------------------|--------|-----------------------------------|-----------|
| <b>Main effect of the two diagnostic groups</b>   |                                                                    |        |                                   |           |
| Left                                              | Fusiform gyrus/Inferior occipital gyrus                            | 52     | -42 -78 -18                       | 17.62     |
| Right                                             | Inferior occipital gyrus                                           | 16     | 45 -75 -9                         | 16.18     |
| Left                                              | Superior medial frontal gyrus                                      | 23     | -6 60 18                          | 16.77     |
| Right                                             | Inferior frontal gyrus                                             | 34     | 48 6 18                           | 17.99     |
| Right                                             | Superior Frontal gyrus                                             | 20     | 15 48 21                          | 13.99     |
| Interaction effect: two groups by four conditions |                                                                    |        |                                   |           |
| Left                                              | Fusiform gyrus/Inferior occipital gyrus                            | 27     | -42 -75 -18                       | 6.82      |
| Right                                             | Middle temporal gyrus                                              | 15     | 54 -63 0                          | 7.69      |
| T-test between FEMDD vs HC in ONF vs BCP          |                                                                    |        |                                   |           |
| Left                                              | Inferior occipital gyrus/Middle occipital gyrus/<br>Fusiform gyrus | 240    | -24 -99 -9                        | -4.45     |
| Right                                             | Inferior occipital gyrus/Middle occipital gy-<br>rus/Lingual gyrus | 30     | 24 -93 -9                         | -3.64     |
| Left                                              | Middle occipital gyrus                                             | 33     | -42 -87 15                        | 4.54      |
| T-test between FEMDD vs HC in SNF vs BCP          |                                                                    |        |                                   |           |
| Left                                              | Inferior occipital gyrus/Calcarine/ Fusiform gy-<br>rus            | 260    | -42 -75 -18                       | -4.48     |
| Right                                             | Inferior Occipital gyrus/Middle occipital gyrus                    | 72     | 45 -78 -9                         | -4.15     |
| Left                                              | Superior medial frontal gyrus/Superior frontal<br>gyrus            | 53     | -6 60 18                          | -4.02     |
| Right                                             | Inferior frontal gyrus                                             | 33     | 48 9 18                           | -3.81     |
| T-test between FEMDD vs HC in SNF vs ONF          |                                                                    |        |                                   |           |
| Right                                             | Inferior frontal gyrus /Insula                                     | 76     | 48 3 15                           | -4.00     |
| Right                                             | Inferior temporal gyrus/Middle temporal gyrus                      | 69     | 51 -63 0                          | -4.51     |
| Left                                              | Middle frontal gyrus/Superior frontal gyrus                        | 30     | -21 48 15                         | -4.15     |

Abbreviations: SNF, self-neutral face; ONF, others neutral face; ODF, others disgust face; BCP, back-ground control picture; FEMDD, first-episode major depressive disorder; HC, healthy control.
